# Supplementary material for: Development of Palladium and Platinum Decorated Granulated Carbon Nanocomposites for Catalytic Chlorate Elimination
Source: MDPI journal article supplement (doi:10.3390/ijms231810514), 2022-09-10
Supplement: s1 [file s1]

# Development of Palladium and Platinum Decorated Granulated Carbon Nanocomposites for Catalytic Chlorate Elimination

Emőke Sikora <sup>1,\*</sup>, Gábor Muránszky <sup>1</sup>, Ferenc Kristály <sup>2</sup>, Béla Fiser <sup>1,3,4</sup>, László Farkas <sup>5</sup>,  
Béla Viskolcz <sup>1,3</sup> and László Vanyorek <sup>1,\*</sup>

<sup>1</sup> Institute of Chemistry, University of Miskolc, H-3515 Miskolc-Egyetemváros, Hungary

<sup>2</sup> Institute of Mineralogy and Geology, University of Miskolc,  
H-3515 Miskolc-Egyetemváros, Hungary

<sup>3</sup> Higher Education and Industrial Cooperation Centre, University of Miskolc,  
H-3515 Miskolc-Egyetemváros, Hungary

<sup>4</sup> Ferenc Rakoczi II Transcarpathian Hungarian College of Higher Education,  
90200 Beregszász, Transcarpathia, Ukraine

<sup>5</sup> BorsodChem Ltd, Bolyai tér 1., H-3700 Kazincbarcika, Hungary

\* Correspondence: kemsik@uni-miskolc.hu (E.S.); kemvanyi@uni-miskolc.hu (L.V.)

## SUPPLEMENTARY MATERIALS

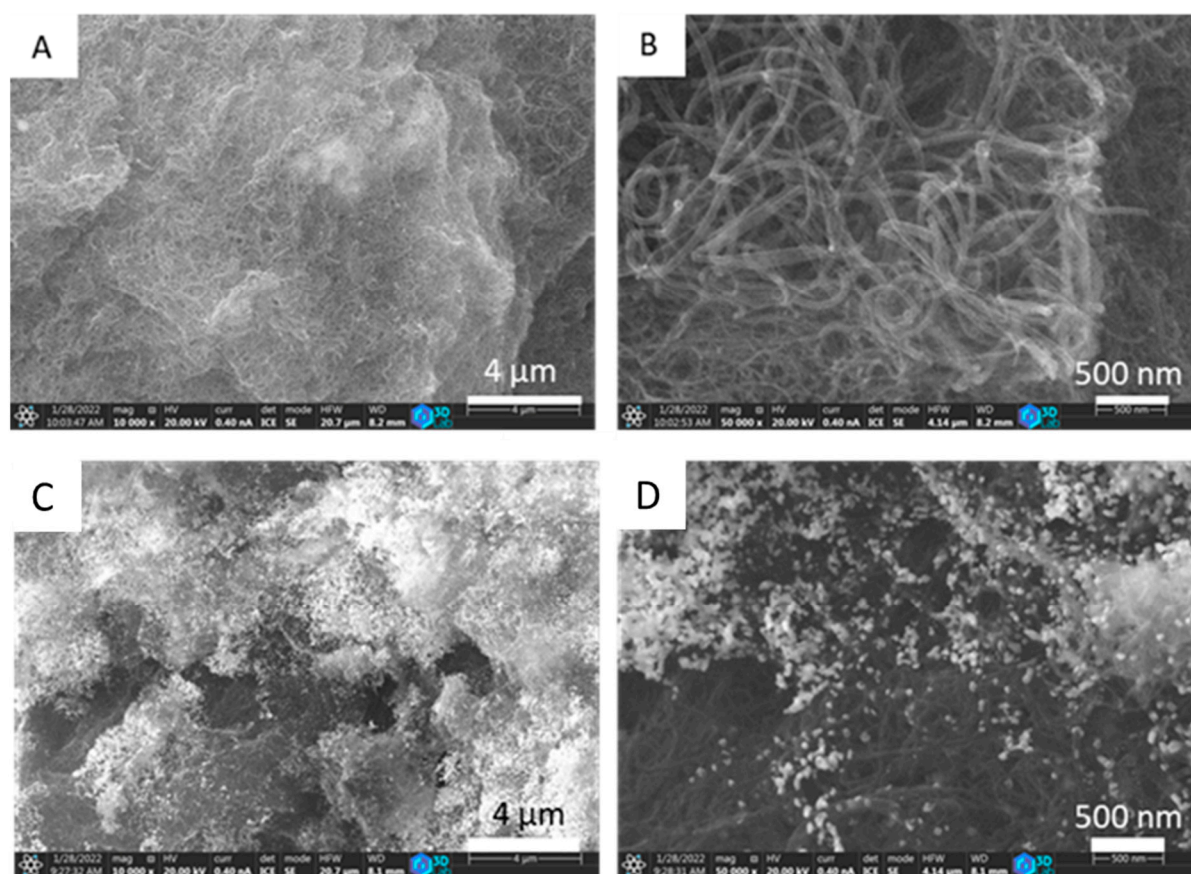

**Figure S1.** SEM images of the prepared calcium containing granulated carbon nanocomposite (GCNC) support (A, B) and the corresponding Pd-Pt/GCNC (C, D) catalyst.

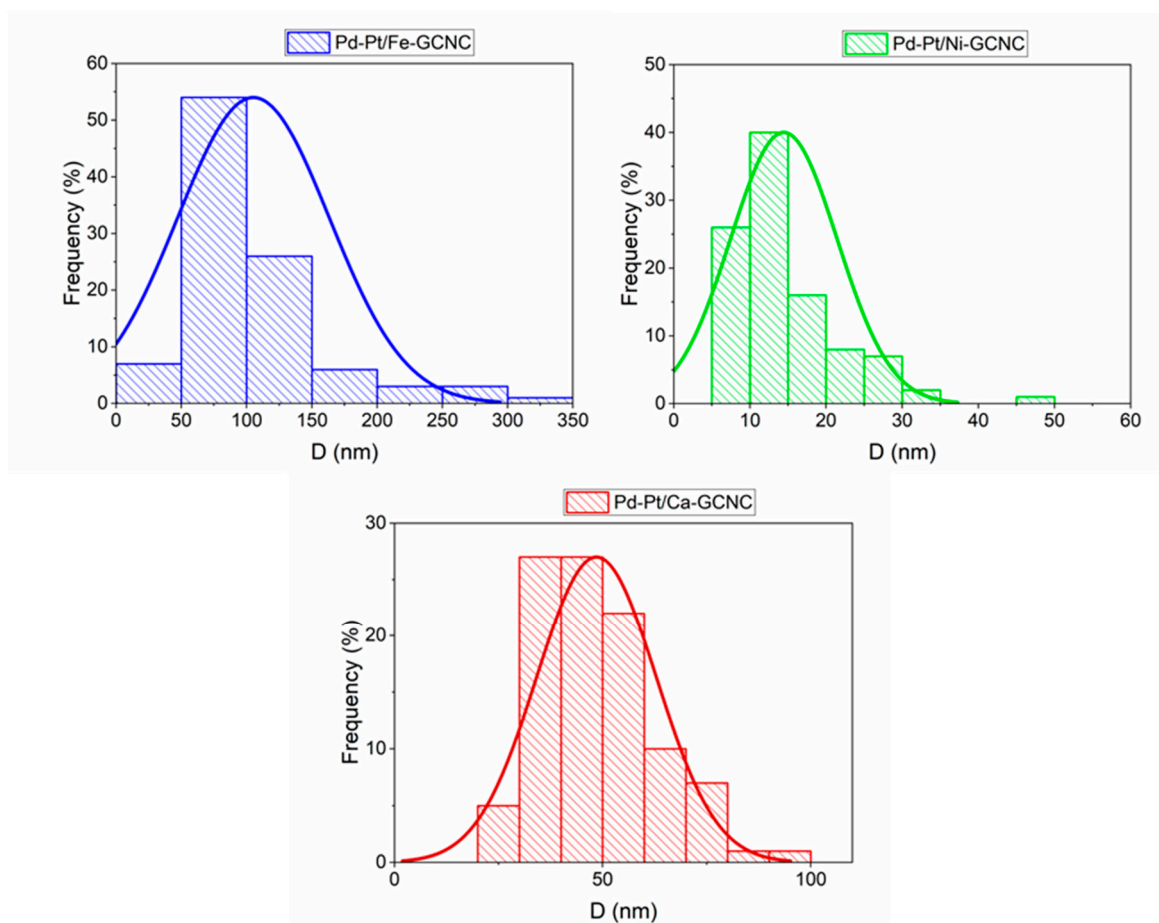

**Figure S2.** Size distribution of the nanoparticles in the samples based on the SEM images.
